# Supplementary material
Source: publisher site journal article supplement (https://www.degruyterbrill.com/publication/isbn/9783050048475/downloadAsset/9783050048475_Buchinformation.pdf)
Supplement: Supplementary file 1 [file 9783050048475_Buchinformation.pdf]

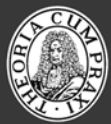

# Akademie Verlag

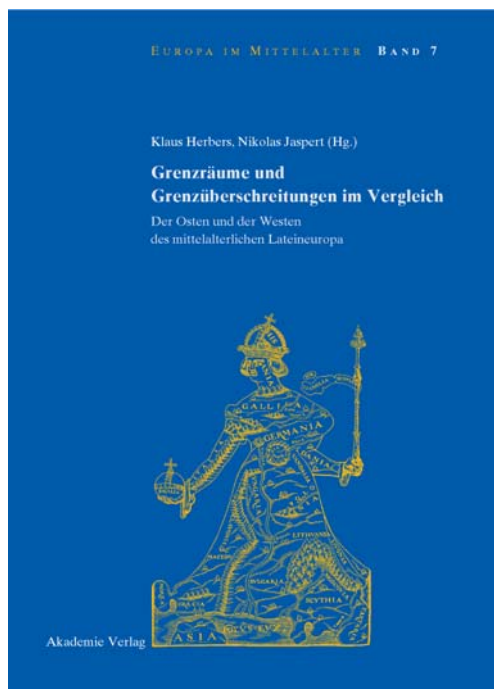

## Grenzräume und Grenzüberschreitungen im Vergleich

*Der Osten und der Westen des  
mittelalterlichen Lateineuropas*

Klaus Herbers, Nikolas Jaspert (Hrsg.)

*Europa im Mittelalter, Band 7*

2007. 459 Seiten, 13 Abbildungen, 170 x 240 mm

Festeinband, € 69,80

ISBN 978-3-05-004155-1

In diesem Band werden erstmals zwei europäische Großregionen vergleichend in den Blick genommen, so dass neue Sichtweisen auf Grenzen und ihre spezifischen Ausprägungen eröffnet werden. Die paarweise Anordnung der in diesem Band versammelten Beiträge gewährleistet in besonderer Weise den Vergleich und verdeutlicht Affinitäten wie Unterschiede zweier geographisch weit voneinander entfernter Räume. Denn beide Bereiche, die Iberische Halbinsel und Ostmitteleuropa, waren zwar in sich einzig, doch in vielem strukturell ähnlich. Diese Randzonen Europas eignen sich aus drei Gründen besonders für eine komparatistische Untersuchung der Grenzenräume und Grenzüberschreitungen im vormodernen Europa.

Zum einen waren sie stärker noch als andere Bereiche durch multi-religiöse und multi-ethnische Gesellschaften geprägt. Hier verdichten sich grundlegende soziale, religiöse und kulturelle Aspekte europäischer Gemeinschaftsordnungen. Zum anderen stießen hier oftmals mit besonderer Schärfe verschiedenartige Kulturen aufeinander. Schließlich und drittens waren diese Räume auch in funktionaler Hinsicht außerordentlich vielgestaltig: Sie dienten als Abgrenzungs- wie auch als Kontakt- und Austauschzonen, als politisch-kulturelle wie auch als kolonisatorische Grenzgebiete, als Militär- und Religionsgrenzen zugleich.
